# Supplementary material for: Electrodeposition of Cobalt Oxides on Carbon Nanotubes for Sensitive Bromhexine Sensing
Source: MDPI journal article supplement (doi:10.3390/molecules27134078), 2022-06-24
Supplement: s1 [file s1]

# Electrodeposition of Cobalt Oxides on Carbon Nanotubes for Sensitive Bromhexine Sensing

Sireerat Lisnund <sup>1,\*</sup>, Vincent Blay <sup>2</sup>, Pratchaya Muamkhunthod <sup>1</sup>, Kittiya Thunyanon <sup>1</sup>, Jaruwan Pansalee <sup>3</sup>, Jirawan Monkrathok <sup>4</sup>, Pachara Maneechote <sup>4</sup>, Kantapat Chansaenpak <sup>5</sup> and Piyanut Pinyou <sup>3,\*</sup>

<sup>1</sup> Department of Applied Chemistry, Faculty of Science and Liberal Arts, Rajamangala University of Technology Isan, Nakhon Ratchasima 30000, Thailand; mpratchaya28@gmail.com (P.M.); kittiya.28082556@gmail.com (K.T.)

<sup>2</sup> Department of Microbiology and Environmental Toxicology, University of California Santa Cruz, Santa Cruz, CA 95064, USA; vroger@ucsc.edu

<sup>3</sup> School of Chemistry, Institute of Science, Suranaree University of Technology, Nakhon Ratchasima 30000, Thailand; jaruwon.pa2565@gmail.com

<sup>4</sup> Institute of Research and Development, Suranaree University of Technology, Nakhon Ratchasima 30000, Thailand; jirawanp5414@gmail.com (J.M.); pachara.ma@sut.ac.th (P.M.)

<sup>5</sup> National Nanotechnology Center, National Science and Technology Development Agency, Thailand Science Park, Pathum Thani 12120, Thailand; kantapat.cha@nanotec.or.th

\* Correspondence: sireerat.in@rmuti.ac.th (S.L.); piyanutp@sut.ac.th (P.P.)

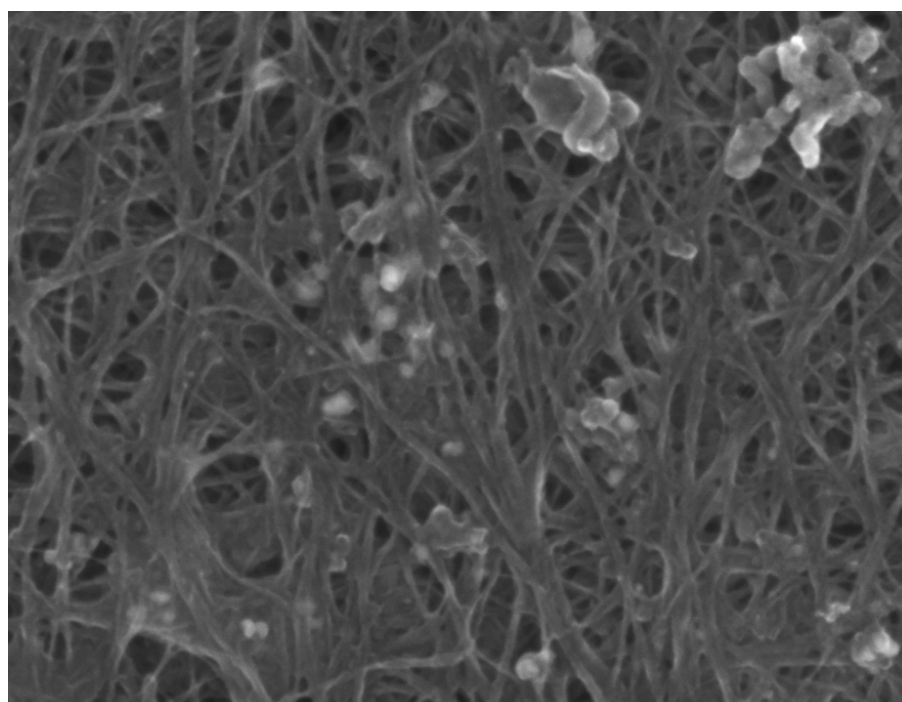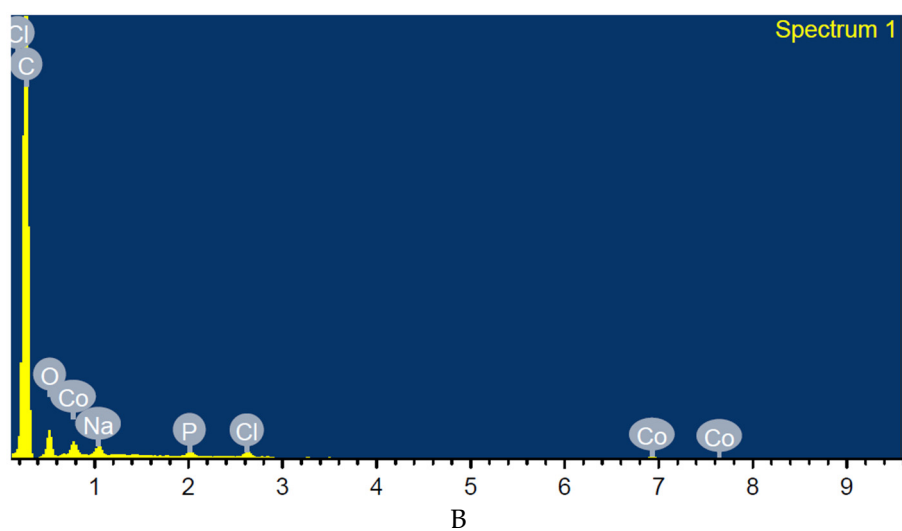

**Figure S1.** (A) SEM-image of CoO<sub>x</sub>/SWCNT/GCE and (B) its SEM-EDX spectrum of CoO<sub>x</sub> particles on the SWCNT/GCE.

**Table S1.** EDX analysis of the CoO<sub>x</sub>/SWCNT/GCE .

| Element | Series | %Weight | %Atomic |
|---------|--------|---------|---------|
| C       | K      | 82.82   | 90.69   |
| O       | K      | 8.17    | 6.72    |
| Na      | K      | 0.90    | 0.52    |
| P       | K      | 0.61    | 0.26    |
| Cl      | K      | 0.95    | 0.35    |
| Co      | L      | 6.54    | 1.46    |

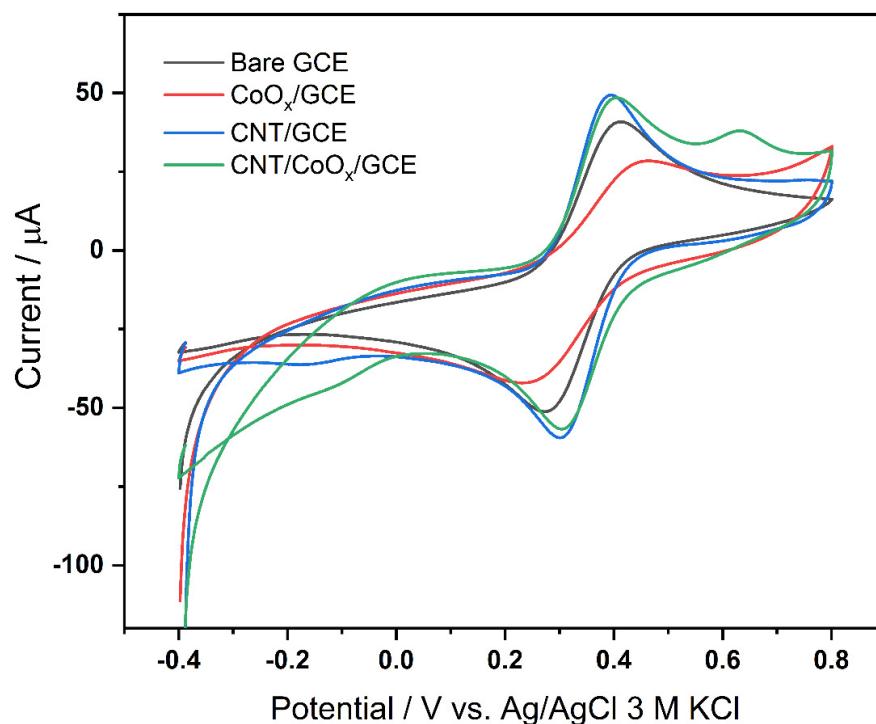

**Figure S2.** Cyclic voltammograms of the GCE with different modifications in 5 mM  $K_3[Fe(CN)_6]$  containing 0.1 M KCl at the scan rate of 50 mV/s.

**Table S2.** Comparison of the electroactive surface area for the electrode with different modifications estimated from CV in 5 mM  $K_3[Fe(CN)_6]$  containing 0.1 M KCl.

| Electrode                   | Electroactive Surface Area (cm <sup>2</sup> ) |
|-----------------------------|-----------------------------------------------|
| Bare GCE                    | 0.0580                                        |
| CoO <sub>x</sub> /GCE       | 0.0345                                        |
| SWCNT/GCE                   | 0.0682                                        |
| CoO <sub>x</sub> /SWCNT/GCE | 0.0637                                        |

**Table S3.** Effect of interfering substances on the current response for BHC determination (50 μM) using the CoO<sub>x</sub>/SWCNT/GCE.

| Substance          | Concentration (mM) | %Deviation |
|--------------------|--------------------|------------|
| NH <sub>4</sub> Cl | 5                  | -1.43      |
| MgCl <sub>2</sub>  | 5                  | -3.21      |
| KNO <sub>3</sub>   | 5                  | -4.16      |
| glucose            | 5                  | -0.42      |
| sucrose            | 5                  | -2.72      |
| ribose             | 5                  | -5.43      |
| caffeine           | 5                  | -6.20      |
